# Supplementary material for: Anticoagulation Knowledge Tool (AKT): Further evidence of validity in the Italian population
Source: PLoS One. 2018 Aug 14;13(8):e0201476. doi: 10.1371/journal.pone.0201476 (PMC6091938; doi:10.1371/journal.pone.0201476)
Supplement: S1 File — (XLSX) [file pone.0201476.s001.xlsx]

## Sheet: Dataset
Group	Gender	Age	Marital Status	Treatment Therapy	Years in treatment (months)	Clinical Indication	CCI	Thromboembolic Complication	Hemorragic Complication	Range INR	A_item1	A_item2	A_item3	A_item4	A_item5	A_item6	A_item7	A_item8	A_item9	A_item10	A_item11	A_item12	A_item13	A_item14	A_item15	A_item16	A_item17	A_item18	A_item19	A_item20	B_item1	B_item2	B_item3	B_item4	B_item5	B_item6	B_item6b	B_item7	Total
2	M	67	married	AVK	> 12	VTE	3	No	No	2 – 3	1	1	1	1	1	1	1	1	0	1	1	1	1	1	1	1	0	1	0	1	0	1	1	1	1	1	0	0	22
2	M	44	Unmarried	AVK	> 12	VTE	1	No	No	2 – 3	1	1	1	1	1	1	1	1	0	1	0	1	1	1	1	1	0	0	1	1	1	1	0	1	1	1	0	0	21
2	M	81	married	AVK	> 36	PAF	2	No	No	2 – 3	1	1	1	1	1	1	1	1	0	1	1	1	1	0	1	1	0	2	1	1	1	1	1	1	1	0	0	0	23
2	F	78	married	AVK	> 36	MVR	1	No	No	2,5 – 3	1	0	0	1	1	1	1	1	1	1	1	1	1	0	1	1	0	0	0	1	0	1	1	0	1	0	0	0	17
2	M	74	married	AVK	> 6	PAF	4	No	No	2-2,5	1	1	1	1	0	1	1	1	1	1	0	1	1	0	1	1	0	0	0	1	1	1	1	1	1	0	0	0	19
2	M	77	married	AVK	> 12	AVR	3	No	No	2 – 3	1	1	0	1	1	1	1	1	0	1	0	1	1	1	1	1	0	0	0	1	0	1	1	0	1	1	1	0	19
2	M	72	married	AVK	> 36	VTE	2	No	No	2 – 3	1	1	0	1	1	1	1	1	1	1	0	1	1	1	1	1	0	0	0	1	0	0	0	0	0	1	0	0	16
2	F	70	married	AVK	> 3	AVR	3	Yes	No	2 – 3	1	1	1	1	1	0	1	1	0	1	0	0	1	1	1	1	0	0	1	0	0	0	1	0	0	0	0	1	15
2	F	82	married	AVK	> 36	PAF-VTE	2	No	No	2 – 3	1	1	1	1	1	1	1	1	1	1	1	1	1	1	1	1	1	3	2	1	1	1	1	1	1	1	2	1	32
2	F	75	married	AVK	> 12	VTE	2	No	No	2 – 3	1	1	1	1	1	1	1	1	0	1	1	0	1	0	1	1	0	3	1	1	1	1	1	1	1	1	1	1	26
2	M	58	married	AVK	> 6	AVR	2	Yes	No	2 – 3	1	1	1	1	1	1	1	1	1	1	1	1	1	1	1	1	1	1	2	1	1	1	1	1	1	1	1	1	29
2	F	73	married	AVK	> 6	VTE	2	No	No	2 – 3	1	1	1	1	1	1	1	1	1	1	1	1	1	1	1	1	1	1	1	0	1	1	1	1	1	1	2	1	28
2	M	84	married	AVK	> 36	PAF	2	No	No	2 – 3	1	1	0	1	1	1	1	1	0	1	1	0	1	0	1	1	0	0	0	1	1	1	1	1	1	0	0	1	19
2	F	53	married	AVK	> 36	PAF	1	No	No	2 – 3	1	1	1	1	1	1	1	1	0	0	0	1	1	0	1	1	1	3	2	0	1	1	1	1	0	1	3	0	26
2	M	63	married	AVK	> 3	PAF	2	No	No	2 – 3	1	1	1	1	0	1	1	0	0	0	0	1	1	1	1	1	0	0	0	0	1	1	1	1	1	1	1	0	18
2	F	55	married	AVK	> 36	MVR	1	No	No	2,5 – 3,5	1	1	1	1	1	1	1	1	1	1	0	1	1	1	1	1	0	1	1	0	1	1	1	1	0	1	2	0	24
2	F	62	Unmarried	AVK	> 3	AVR-MVR	4	No	No	2,5 – 3,5	1	1	1	1	1	0	0	1	0	1	0	0	1	1	1	1	1	1	1	1	1	1	1	1	1	1	1	0	22
2	M	77	married	AVK	> 36	PAF	1	No	No	2 – 3	1	1	1	1	1	0	1	1	0	1	1	1	1	1	1	1	0	0	0	1	1	1	1	1	1	0	0	0	20
2	M	80	married	AVK	> 36	PAF	1	No	No	2 – 3	1	1	0	1	1	0	1	1	1	1	1	1	1	1	1	1	0	0	1	1	1	1	1	1	0	0	0	0	20
2	M	74	Unmerried	AVK	> 3	PAF	1	No	No	2 – 3	1	1	1	1	1	0	1	1	1	1	0	0	1	0	1	1	1	0	0	1	1	1	1	1	1	0	0	0	19
2	M	82	married	AVK	> 36	PAF	1	No	Yes	2 – 3	1	1	1	1	1	1	0	1	0	1	0	1	1	1	1	1	0	0	1	1	1	1	1	1	1	0	0	0	20
2	M	75	married	AVK	> 6	PAF	4	No	No	2 – 3	1	1	1	1	1	1	1	1	0	1	0	1	1	1	1	1	1	2	1	0	1	1	1	1	1	1	1	0	25
2	F	73	Unmarried	AVK	> 36	PAF	3	No	No	2 – 3	1	1	0	1	1	1	1	1	0	1	0	1	1	1	1	1	0	0	1	1	1	1	1	1	1	1	3	0	24
2	M	66	married	AVK	> 6	AF	1	No	No	2 – 3	1	1	1	1	1	1	1	1	1	1	1	1	1	1	1	1	1	3	1	1	1	1	1	1	1	1	3	1	32
2	F	68	married	AVK	> 36	PAF-VTE	3	No	No	2 – 3	1	1	1	1	1	1	1	1	0	1	0	0	0	1	1	1	1	1	1	1	1	0	1	1	1	1	2	1	24
2	M	46	Unmarried	AVK	> 36	VTE	4	No	No	2,5 – 3,5	1	1	1	1	1	2	1	1	0	1	0	0	1	1	1	1	0	1	1	1	1	1	1	1	1	1	2	1	26
2	M	68	married	AVK	> 12	AF-VTE	3	No	No	2 – 3	1	1	1	1	1	1	1	0	1	1	0	1	1	1	1	1	0	0	1	1	1	1	1	1	1	0	0	0	21
2	M	69	Unmarried	AVK	> 36	AVR	3	No	No	2,5 – 3	1	1	1	1	1	0	1	1	1	1	1	1	1	1	1	1	0	0	0	1	1	1	1	1	0	1	1	1	23
2	M	73	married	AVK	> 12	VTE	4	No	No	2 – 3	1	1	1	1	1	0	1	1	0	1	0	0	1	1	1	1	0	0	0	0	1	1	1	0	1	1	3	0	20
2	F	66	Unmarried	AVK	> 36	AVR	2	No	No	2,5 – 3	1	0	0	1	1	0	1	1	0	1	1	1	1	1	1	1	1	0	0	1	1	1	1	0	0	1	2	1	21
2	M	80	Unmarried	AVK	> 12	PAF-VTE	1	No	No	2 – 3	1	1	0	1	0	0	1	1	0	0	0	0	1	1	1	1	0	1	1	0	0	1	1	0	0	1	2	0	16
2	M	68	married	AVK	> 36	PTA	4	No	No	2 – 3	1	1	1	1	1	0	1	1	0	1	0	0	1	1	1	1	0	1	0	0	0	0	1	0	0	0	0	0	14
2	M	69	married	AVK	> 12	PAF	4	No	No	2 – 3	1	0	1	1	1	1	1	1	0	1	0	0	1	1	1	1	1	1	0	1	0	0	1	1	1	1	3	0	22
2	M	81	married	AVK	> 36	FA	3	No	No	2 – 3	1	1	0	1	1	2	1	1	0	1	0	0	1	1	1	1	1	1	0	0	1	1	1	0	1	1	0	0	20
2	F	40	married	AVK	> 12	MVR	1	No	Yes	3-3,5	1	1	1	1	1	0	1	1	1	0	1	1	1	1	1	1	0	0	0	1	1	1	1	1	1	1	2	0	23
2	F	84	married	AVK	> 36	PAF	1	No	No	2 – 3	1	1	1	1	1	0	1	1	1	1	1	1	1	0	1	1	1	2	0	1	1	1	1	1	1	1	1	1	26
2	F	82	married	AVK	> 36	AF	1	No	No	2 – 3	1	1	1	1	1	0	1	1	0	1	0	0	1	1	1	1	0	1	0	1	1	1	1	1	1	1	1	0	21
2	F	71	married	AVK	> 36	AF	1	No	No	2 – 3	1	1	1	1	0	0	1	1	0	1	0	0	1	1	1	1	1	1	1	1	0	0	1	1	1	1	2	1	22
2	M	61	married	AVK	> 36	AVR	2	No	No	2,5 – 3,5	1	1	1	1	1	0	1	1	0	1	1	1	1	1	1	1	1	1	2	1	1	1	1	1	1	1	1	1	27
2	F	64	married	AVK	> 36	AVR	1	No	No	2,5 – 3,5	1	1	1	1	1	0	1	1	0	1	1	1	1	1	1	1	1	1	0	0	1	1	1	1	1	1	2	0	24
2	F	69	married	AVK	> 36	AVR	1	No	No	2 – 3	1	1	1	1	1	2	1	1	0	1	0	1	1	1	1	1	1	1	0	1	1	1	1	1	1	1	3	0	27
2	M	86	Unmarried	AVK	> 36	PAF	1	No	No	2 – 3	1	1	0	1	0	2	1	1	0	1	1	1	1	1	1	1	0	2	2	1	1	1	1	1	1	1	3	1	29
2	M	69	married	AVK	> 36	PAF	1	No	No	2 – 3	1	0	1	1	1	0	1	1	1	1	1	0	1	1	1	1	1	1	0	0	1	1	1	1	1	1	2	0	23
2	F	62	married	AVK	> 6	PAF	2	No	No	2 – 3	1	1	1	1	1	2	1	1	0	1	0	1	1	1	1	1	0	2	0	1	0	1	1	1	1	1	2	0	25
2	M	74	married	AVK	> 12	VTE	2	No	No	2 – 3	1	1	1	1	1	1	1	1	0	1	0	1	1	1	1	1	0	0	0	0	0	1	1	0	1	1	1	1	20
2	M	76	married	AVK	> 36	AF	1	No	No	2 – 3	1	1	1	1	1	1	1	1	0	1	1	1	1	1	1	1	1	2	0	1	0	1	1	0	0	0	0	0	21
2	F	65	married	AVK	> 36	VTE	1	No	No	2 – 3	1	1	1	1	1	0	1	1	0	1	0	0	1	1	1	1	1	1	0	1	1	1	1	1	1	1	0	0	21
2	M	81	married	AVK	> 36	AVR	1	No	No	2,5 – 3,5	1	1	1	1	1	1	1	1	0	1	0	0	1	1	1	1	1	0	1	1	0	0	1	1	1	1	3	1	24
2	F	71	married	AVK	> 36	AVR	2	No	No	2,5 – 3,5	1	1	1	1	1	0	1	1	0	1	1	1	1	1	1	1	1	1	1	0	1	0	1	1	1	1	1	1	24
2	M	72	married	AVK	> 36	AF	1	No	No	2 – 3	1	1	1	1	1	1	1	1	0	1	1	0	1	1	1	1	1	2	2	1	1	1	1	1	1	1	3	1	30
2	M	73	Unmarried	AVK	> 12	AF	1	No	Yes	2 – 3	1	0	0	1	1	0	1	1	1	1	0	0	0	1	1	1	0	1	0	0	0	0	1	0	1	0	0	0	13
2	M	79	married	AVK	> 36	AF	1	No	No	2 – 3	1	1	1	1	1	1	1	1	0	1	0	1	1	1	1	1	1	1	2	0	1	1	1	1	1	1	1	0	25
2	M	69	Unmarried	AVK	> 36	AF	1	No	No	2 – 3	1	1	0	1	1	0	1	0	0	1	0	0	1	1	1	1	1	2	0	0	0	0	1	1	1	1	1	0	18
2	F	75	married	AVK	> 36	VTE	1	No	No	2 – 3	1	1	0	1	1	1	1	1	1	1	1	1	1	1	1	1	1	0	0	0	1	1	1	1	1	1	3	0	25
2	F	53	married	AVK	> 36	AF	1	No	No	2 – 3	1	1	0	1	1	0	1	1	1	1	1	1	1	1	1	1	0	1	0	1	1	0	1	1	1	1	2	0	23
2	M	75	married	AVK	> 36	AF-VTE	3	No	No	2 – 3	1	1	0	1	1	0	1	1	1	1	1	1	1	1	1	1	0	1	0	1	0	0	1	1	1	1	2	0	22
2	F	75	married	AVK	> 36	AVR	2	No	No	2,5 – 3,5	1	0	0	1	1	0	1	1	0	0	0	0	1	1	1	1	0	1	0	1	0	0	1	0	1	1	1	0	15
2	M	84	Unmarried	AVK	> 36	VTE	1	No	No	2 – 3	1	1	0	1	1	1	1	1	1	1	1	1	1	1	1	1	1	2	1	1	1	1	1	1	1	1	2	0	28
2	F	74	Unmarried	AVK	> 36	AF	1	No	No	2,5 – 3	1	1	1	1	1	0	1	1	0	1	1	1	1	1	1	1	1	1	1	0	1	1	1	1	1	1	3	0	26
2	M	75	married	AVK	> 36	AF	1	No	No	2 – 3	1	0	0	1	1	1	1	1	0	1	0	0	1	1	1	1	1	3	0	0	1	1	1	0	1	1	1	0	21
2	M	77	married	AVK	> 36	PAF	2	No	No	2,5 – 3	1	1	1	1	1	0	1	1	0	1	1	1	1	1	1	1	1	3	1	1	1	1	1	1	1	1	2	1	29
2	F	38	married	AVK	> 12	MVR	1	No	No	2 – 3	1	1	0	1	1	0	1	0	1	0	1	1	1	1	1	1	0	0	0	1	1	1	1	0	1	1	2	0	20
2	M	85	married	AVK	> 6	PAF	3	No	No	2 – 3	1	1	1	1	0	2	1	1	0	1	0	1	1	1	1	1	1	2	1	1	1	1	1	1	1	1	0	0	25
2	M	79	married	AVK	> 36	AF	2	No	No	2-2,5	1	0	0	1	1	0	1	1	1	1	0	1	1	0	0	0	0	0	0	0	0	0	1	1	1	0	0	0	12
2	M	79	married	AVK	> 36	MVR	2	No	No	3-3,5	1	0	0	1	1	0	1	1	1	1	1	1	1	1	1	1	1	1	1	1	1	1	1	1	1	1	2	1	26
2	M	78	married	AVK	> 36	PAF	2	No	No	2 – 3	1	1	1	1	1	1	1	1	1	1	0	0	1	1	1	1	1	2	1	1	1	1	1	1	1	1	0	0	25
2	M	80	married	AVK	> 36	MVR	2	No	No	2 – 3	1	1	0	1	1	0	1	1	0	1	0	1	1	1	1	1	1	1	0	1	1	1	1	1	1	1	1	0	22
2	M	85	married	AVK	> 36	PAF	2	No	No	2 – 3	1	1	1	1	1	0	1	1	1	1	0	1	1	1	1	1	1	2	0	0	1	1	1	1	1	1	1	0	24
2	F	70	Unmarried	AVK	> 36	AF	1	No	No	2 – 3	1	1	1	1	1	0	1	1	1	1	1	0	1	1	1	1	1	1	0	1	1	1	1	1	1	1	2	0	25
2	F	88	Unmarried	AVK	> 36	PAF	1	No	No	2 – 3	1	1	1	1	1	0	1	1	0	0	1	1	1	1	1	1	0	2	1	0	1	1	1	1	1	1	1	0	23
2	F	82	married	AVK	> 36	AF	1	No	No	2 – 3	1	1	1	1	1	0	1	1	0	1	0	0	1	1	1	1	0	1	0	1	1	1	1	1	1	1	3	0	23
2	M	73	married	AVK	> 36	AF	2	No	No	2 – 3	1	1	0	1	1	0	1	1	0	1	0	1	1	1	1	1	1	0	1	0	1	1	1	1	1	1	2	0	22
2	M	78	married	AVK	> 36	AF	1	No	No	2 – 3	1	1	0	1	1	0	1	1	0	1	0	1	1	0	1	1	0	2	0	0	1	1	1	1	1	1	0	0	19
2	F	74	married	DOAC	> 6	PAF-VTE	4	No	No		1	1	1	1	1	0	1	1	0	1	1	0	1	1	1	1	1	2	1	1									18
2	F	68	married	AVK	> 36	PAF	1	No	No	2 – 3	1	1	1	1	1	2	1	1	0	1	0	0	1	1	1	1	1	2	1	1	1	1	1	1	1	1	3	0	28
2	M	85	married	AVK	> 36	AF	2	No	No	2 – 3	1	0	1	0	0	0	1	1	0	1	1	1	1	1	1	1	0	1	2	1	0	0	1	0	1	0	0	0	17
2	M	80	Unmarried	AVK	> 12	PAF	2	No	No	2 – 3	1	0	0	1	1	1	1	1	1	1	1	1	1	1	1	1	0	1	0	1	0	1	1	0	0	0	0	0	18
2	F	81	married	AVK	> 36	AF	1	No	No	2 – 3	0	0	1	1	1	0	1	1	0	1	1	1	1	0	1	1	1	1	0	0	1	1	1	1	1	1	2	1	22
2	M	83	married	AVK	> 36	AF	1	No	No	2,5 – 3	0	0	1	1	1	0	1	1	0	1	1	1	1	1	1	1	1	2	0	0	1	0	1	1	1	1	3	1	24
2	F	77	married	AVK	> 36	AF-AVR	2	No	No	2 – 3	1	1	0	1	1	0	1	1	0	1	0	1	1	1	1	1	1	1	0	1	1	1	1	1	1	1	3	1	25
2	M	78	married	AVK	> 36	AF	1	No	No	2 – 3	1	1	0	1	1	0	1	1	0	1	1	1	1	0	1	1	1	0	2	0	1	1	1	1	1	1	1	1	23
2	F	64	married	AVK	> 12	AF	1	No	No	2 – 3	1	1	0	1	1	2	1	1	1	1	1	1	1	1	1	1	1	2	1	1	1	1	1	1	1	1	2	1	30
2	F	74	married	AVK	> 36	AF	1	No	No	2 – 3	1	1	1	1	1	1	1	1	1	1	1	1	1	1	1	1	0	1	0	1	1	1	1	1	1	1	3	1	28
2	M	84	married	AVK	> 36	ICTUS	2	No	No	2 – 3	1	0	0	1	1	0	1	1	0	1	0	1	1	1	1	1	0	1	0	0	1	1	1	1	1	1	2	0	20
2	M	66	Unmarried	AVK	> 36	AF	1	No	No	2 – 3	1	1	1	1	1	2	1	1	0	1	1	1	1	1	1	1	1	1	2	1	1	1	1	1	1	1	3	1	31
2	M	74	married	AVK	> 36	VTE	2	No	No	2 – 3	1	1	1	1	1	1	1	1	1	1	1	1	1	1	1	1	1	1	3	1	1	1	1	1	1	1	1	1	30
2	M	62	Unmarried	AVK	> 36	AF-MVR	1	No	No	2,5 – 3,5	1	1	1	1	1	1	1	1	1	1	1	1	1	1	1	1	1	3	3	1	1	1	1	1	1	1	3	1	34
2	F	65	married	AVK	> 36	AVR-MVR	1	No	No	2,5 – 3,5	1	1	1	1	1	0	1	1	1	1	1	1	1	1	1	1	1	3	2	0	1	1	1	1	1	1	3	1	31
2	M	67	married	AVK	> 36	MVR	1	No	No	2,5 – 3,5	1	1	1	1	1	2	1	1	0	1	1	1	1	1	1	1	1	0	2	1	1	1	1	1	1	1	1	1	28
2	F	77	married	AVK	> 36	AVR	1	No	No	2 – 3	1	1	0	1	1	0	1	1	1	1	0	1	1	1	1	1	0	1	0	1	1	1	1	1	1	1	0	1	22
2	M	81	married	AVK	> 36	AF	1	No	No	2 – 3	1	1	0	1	1	0	1	1	1	1	0	0	1	1	1	1	0	1	0	1	1	1	1	1	1	1	1	1	22
2	F	60	married	AVK	> 36	MVR	1	No	Yes	2 – 3	1	1	1	1	1	2	1	1	1	1	0	0	1	1	1	1	1	3	1	1	1	1	1	1	1	1	3	1	31
2	M	79	Unmarried	AVK	> 36	IMA-AF	4	No	No	2 – 3	1	1	1	1	1	1	1	1	1	0	0	1	1	0	1	1	1	3	2	1	1	1	1	1	1	1	1	0	27
2	M	48	married	DOAC	> 12	IMA	4	No	No		0	1	1	0	0	0	1	1	1	1	1	0	1	1	1	1	1	0	0	0									12
2	M	74	married	AVK	> 12	AF	2	No	No	2,5 – 3	1	0	0	1	0	0	1	1	0	1	1	1	1	0	1	1	0	0	0	0	0	0	1	1	1	1	1	0	15
2	M	66	Unmarried	AVK	> 36	PAF-VTE	2	No	Yes	2 – 3	1	1	0	1	1	1	1	1	0	1	1	1	1	1	1	1	1	3	0	1	0	0	1	1	1	1	1	1	25
2	F	62	married	AVK	> 12	AVR	1	No	No	2,5 – 3	1	1	1	1	1	2	1	0	0	1	1	1	1	1	1	1	1	2	1	1	1	1	1	1	1	1	2	1	29
2	M	85	married	DOAC	> 12		4	No	No		1	0	1	1	0	0	1	1	0	1	0	0	1	1	1	1	1	0	0	0									11
2	F	67	married	DOAC	> 12	AF	0	No	No		1	1	1	1	1	1	1	1	0	1	0	0	1	1	1	1	1	2	2	1									19
2	M	71	married	DOAC	> 36	AF	2	No	No		1	1	0	1	0	0	1	1	0	1	0	1	0	1	1	1	0	0	0	1									11
2	M	76	married	AVK	> 36	PAF	1	No	No	2 – 3	1	1	0	1	1	2	1	1	0	1	0	1	1	1	1	1	1	2	1	1	1	1	1	1	1	1	3	1	29
2	M	62	married	AVK	> 36	VTE	2	No	No	2 – 3	1	1	1	1	1	2	1	1	1	1	1	1	1	1	1	1	1	2	1	1	1	1	1	1	1	1	3	0	31
2	M	83	married	AVK	> 36	PAF	1	No	No	2 – 3	1	1	0	1	1	0	1	1	0	1	1	1	0	1	1	1	0	1	0	0	1	1	1	1	1	1	1	1	21
2	F	74	married	AVK	> 36	PAF	0	No	No	2-2,5	1	1	0	1	1	0	1	1	0	1	1	1	0	1	1	1	0	1	0	0	1	1	1	1	1	1	1	1	21
2	M	68	married	AVK	> 36	AF	1	No	No	2 – 3	1	1	1	1	1	0	1	1	1	1	0	1	1	1	1	1	0	2	0	0	1	1	1	1	1	1	3	0	25
2	M	63	Unmarried	AVK	> 36	AF	2	No	No	2 – 3	1	1	0	1	0	2	1	1	1	0	1	0	1	0	1	1	1	2	1	0	1	1	1	1	1	1	3	1	26
2	M	80	married	AVK	> 36	AF	2	No	No	2 – 3	1	1	0	1	1	2	1	1	1	1	0	1	1	0	1	1	1	2	1	1	1	1	1	1	1	1	1	1	27
2	M	68	married	AVK	> 12	AF	1	No	No	2 – 3	1	1	1	1	1	2	1	1	1	1	0	0	1	0	1	1	1	2	1	1	1	1	1	1	1	1	3	1	29
2	M	69	married	AVK	> 36	VTE	1	No	No	2 – 3	1	1	0	1	1	2	1	1	1	1	1	1	1	1	1	1	1	1	1	1	1	1	1	1	1	1	3	1	30
2	M	73	married	AVK	> 36	VTE	1	No	No	2 – 3	1	1	1	1	1	1	1	1	1	1	0	0	1	1	1	1	1	0	0	0	1	1	1	1	1	1	1	0	22
2	M	57	unmarried	DOAC	> 12	FA	1	No	No		1	1	1	1	1	1	1	1	0	1	1	0	1	1	1	1	1	2	0	1									18
2	F	64	unmarried	DOAC	> 12	AF	1	No	No		1	1	1	1	1	1	1	1	0	1	1	0	1	1	1	1	0	0	0	1									15
2	M	75	married	DOAC	> 36	PAF	1	No	No		1	1	1	1	1	1	1	1	1	1	1	0	1	0	1	1	1	2	1	1									19
3	F	35	married				0				0	0	1	1	1	1	1	0	1	1	0	1	1	1	1	1	0	0	1	0	0	1	0	0	0	0	0	0	14
3	F	60	married				0				1	1	1	1	1	0	1	1	1	1	0	0	1	1	1	1	1	2	1	1	0	0	1	1	0	1	1	1	23
3	M	70	married				1				0	0	1	0	1	1	1	1	0	1	0	1	1	1	1	1	0	2	1	1	0	0	1	0	0	0	0	0	17
3	F	33	married				0				0	0	0	0	0	0	1	1	1	1	0	0	0	1	1	1	0	0	2	1	0	0	1	1	0	0	0	0	12
3	F	29	unmarried				0				0	0	0	0	0	0	1	0	0	1	0	0	0	1	1	1	0	0	0	1	0	0	0	0	0	0	0	0	6
3	M	35	married				0				0	0	1	0	0	0	1	0	1	1	0	0	1	1	1	1	1	2	0	0	0	0	1	0	0	1	1	1	15
3	M	36	married				0				0	1	0	1	1	1	1	1	0	1	0	0	1	1	1	1	1	0	0	0	0	0	0	0	0	1	0	0	13
3	M	64	married				1				0	1	1	0	1	0	0	1	0	1	0	0	1	1	1	1	1	1	0	0	0	0	1	0	0	0	0	0	13
3	M	29	Unmarried				0				0	1	0	0	0	0	1	1	0	1	0	0	1	0	1	1	0	0	0	0	0	0	0	0	0	0	0	0	7
3	F	35	married				0				0	0	0	1	0	0	1	1	0	0	0	0	1	1	1	1	0	0	0	1	0	0	1	0	0	0	0	0	9
3	F	61	married				0				0	1	0	1	0	0	1	1	0	1	0	0	1	1	1	1	0	0	0	1	0	0	1	0	0	0	0	0	11
3	M	60	married				0				0	1	0	0	1	0	1	1	0	1	1	1	1	1	1	1	0	0	1	1	0	0	1	1	0	1	1	0	17
3	F	61	married				0				1	1	0	0	1	0	1	1	0	1	0	0	1	1	1	1	0	0	1	1	0	0	1	1	1	1	1	0	17
3	M	65	married				4				0	0	0	1	1	0	1	1	0	0	0	0	1	1	1	1	0	0	0	1	0	0	1	1	1	0	0	0	16
3	F	72	married				0				0	0	0	1	1	0	1	1	1	1	0	0	1	1	1	1	0	0	0	0	0	0	1	1	0	1	1	0	14
3	M	72	married				0				0	0	0	1	1	0	1	1	0	1	0	0	1	1	1	1	0	0	0	0	0	0	1	1	0	0	0	0	11
3	M	54	married				1				0	0	0	0	1	0	1	1	0	1	1	0	1	1	1	1	0	1	1	0	0	0	0	1	1	1	0	0	15
3	F	52	married				0				0	1	0	1	1	0	1	1	0	1	0	1	1	1	1	1	0	0	0	1	0	0	1	1	1	1	0	0	16
3	F	76	unmarried				1				1	0	1	1	0	0	0	1	0	0	0	0	0	1	1	1	0	0	0	1	0	0	0	0	0	0	0	0	9
3	M	27	unmarried				0				0	0	0	0	0	0	1	1	1	0	0	1	0	1	1	1	0	0	0	1	0	0	1	0	0	1	0	0	10
3	M	24	unmarried				0				0	1	1	0	0	0	1	0	1	1	0	0	0	1	1	1	0	0	0	1	0	0	1	0	0	1	0	0	11
3	M	59	married				0				0	1	0	0	0	1	1	1	0	1	1	0	1	1	1	1	1	1	2	1	0	0	0	0	0	0	1	0	16
3	F	55	married				0				0	1	1	1	0	0	1	0	0	1	0	0	0	0	1	1	0	0	0	1	0	0	0	0	0	1	0	0	9
3	M	27	married				0				0	0	0	0	0	0	0	0	0	0	0	0	0	0	0	0	0	0	0	0	0	0	0	0	0	0	0	0	0
3	M	50	unmarried				0				0	1	0	1	1	1	1	0	0	0	0	0	0	0	1	0	1	1	0	0	0	0	0	0	0	0		1	9
3	F	29	unmarried				0				1	1	1	1	1	1	1	1	1	0	1	1	1	1	1	1	1	1	1	1	0	0	1	1	0	1	1	1	24
3	F	23	unmarried				0				0	1	0	1	0	0	1	1	1	1	0	1	1	1	1	1	1	0	0	0	0	0	1	1	1	1	0	0	16
3	M	85	married				1				1	0	1	1	1	0	0	1	0	0	1	0	1	1	1	1	1	1	1	1	0	0	1	1	1	0	0	0	17
3	F	75	married				2				1	1	1	1	1	1	1	1	0	1	0	1	0	0	1	1	1	1	1	1	0	0	1	0	1	1	1	0	20
3	M	40	married				0				1	1	0	1	1	0	0	1	1	1	0	0	1	1	1	1	0	1	2	1	1	1	1	1	0	0	0	0	19
3	M	53	unmarried				0				0	0	0	0	0	0	0	1	0	1	0	1	1	1	1	1	0	0	0	0	0	0	1	0	0	0	0	0	8
3	M	32	unmarried				0				1	1	1	1	1	1	0	1	0	1	0	0	1	1	1	1	1	1	0	1	0	0	0	1	0	0	0	0	16
3	M	57	married				0				0	1	0	0	1	0	1	1	1	1	0	1	1	1	1	1	0	0	0	0	0	0	0	0	0	0	0	0	11
3	M	41	married				0				1	0	1	1	1	1	1	0	0	1	0	1	1	1	1	1	1	0	1	1	1	1	1	1	1	1	1	0	22
3	M	60	married				0				0	1	1	0	1	0	0	0	1	1	0	1	1	1	1	1	1	0	0	1	0	0	0	0	0	0	0	0	12
3	M	21	unmarried				0				0	1	1	1	0	0	1	1	1	1	0	1	1	1	1	1	1	1	0	1	0	0	0	0	0	1	0	0	16
3	F	86	unmarried				0				1	0	0	1	0	0	1	0	1	1	1	1	0	1	1	1	0	0	0	0	0	0	0	0	0	1	0	0	11
3	F	49	unmarried				0				1	1	0	1	1	0	1	0	1	1	1	1	0	1	1	1	1	1	0	1	0	0	0	0	0	1	0	0	16
3	M	85	unmarried				0				1	0	0	0	0	0	0	0	1	0	0	0	0	1	1	1	0	0	0	0	0	0	0	0	0	0	0	0	5
3	M	70	unmarried				0				1	0	1	1	0	0	1	1	0	0	0	0	0	1	1	1	1	0	0	1	0	0	0	0	0	1	0	0	11
3	F	44	unmarried				0				1	1	1	1	1	1	1	1	0	1	0	0	1	1	1	1	0	2	1	1	1	0	0	1	1	1	0	0	21
3	F	57	unmarried				0				0	1	0	1	1	0	1	0	1	1	1	1	1	0	1	1	1	3	0	1	0	0	1	1	0	0	0	0	18
3	F	20	unmarried				0				0	1	0	1	0	0	1	0	0	1	0	0	1	1	1	1	0	1	1	1	0	0	1	1	0	1	0	0	14
3	F	48	married				0				0	1	0	1	1	0	1	1	0	0	0	1	1	1	1	1	0	1	2	1	0	0	1	0	0	1	0	1	17
3	F	42	married				0				0	0	0	1	1	0	1	1	0	1	0	0	1	1	1	1	0	3	2	1	0	0	0	0	0	1	0	0	16
3	M	34	unmarried				999				0	1	1	1	0	0	1	1	0	1	0	1	1	1	1	1	1	3	1	1	0	0	0	0	0	0	0	0	17
3	M	40	married				999				0	0	0	0	0	0	0	0	0	0	0	0	0	0	1	1	0	0	0	0	0	0	0	0	0	0	0	0	2
3	M	45	married				999				0	0	0	1	0	0	1	0	1	0	1	1	0	1	1	1	0	0	0	1	0	0	1	1	0	0	0	1	12
3	F	54	unmarried				0				0	1	0	1	1	0	1	1	0	1	1	1	1	1	1	1	1	0	1	1	0	0	1	1	1	1	1	1	21
3	F	53	married				1				1	1	0	1	1	0	1	1	1	1	1	1	1	1	1	1	0	0	0	1	0	0	1	1	1	1	1	1	21
3	M	27	married				0				0	1	0	0	1	0	1	1	1	1	0	1	0	1	1	1	1	0	0	1	0	0	1	0	0	1	0	0	14
3	M	57	married				1				0	1	1	1	1	0	0	1	1	1	0	0	1	1	1	1	1	0	1	1	0	0	1	0	0	1	1	0	17
3	F	54	married				0				0	1	1	1	1	0	1	1	1	1	1	1	0	0	1	1	1	0	0	1	0	0	1	1	1	0	0	0	17
3	F	56	unmarried				0				1	1	1	1	1	0	0	1	0	1	0	1	0	1	1	1	1	2	0	0	0	0	1	0	0	0	0	1	16
3	M	60	married				0				1	0	1	1	1	0	1	1	1	1	0	0	1	1	1	1	1	2	1	1	0	0	1	1	0	0	0	1	20
3	F	60	unmarried				0				1	0	1	1	1	1	1	1	0	1	0	1	1	1	1	1	1	2	1	0	0	0	1	1	1	1	3	1	25
3	F	50	married				0				1	1	1	1	1	1	0	1	0	1	0	0	1	1	1	1	1	2	0	1	0	0	1	0	0	1	3	1	22
3	F	62	married				1				1	1	1	1	1	0	1	1	0	1	1	1	1	1	1	1	1	2	1	1	0	1	1	1	0	1	2	1	26
3	F	60	married				1				0	0	0	1	1	0	1	1	0	1	1	1	1	1	1	1	1	2	1	1	0	0	1	0	0	1	2	1	21
3	M	46	married				0				1	0	1	1	1	1	1	1	1	1	0	1	1	1	1	1	1	3	0	1	0	0	1	1	1	0	0	0	22
3	M	50	married				0				1	0	1	1	1	1	1	1	1	1	0	0	1	1	1	1	1	2	1	1	0	0	1	1	1	1	2	1	25
3	F	51	married				0				0	0	0	0	0	0	1	1	0	0	0	0	0	1	1	1	0	0	0	0	0	0	0	0	0	0	0	0	5
3	M	50	married				3				0	1	1	1	1	1	0	1	0	1	1	0	1	0	1	1	0	0	0	0	0	0	0	0	0	0	0	0	11
3	M	50	married				0				0	0	0	1	0	0	1	1	0	1	0	0	1	1	1	1	0	0	0	0	0	0	0	0	0	1	0	0	9
3	M	28	unmarried				0				1	1	1	0	1	0	1	1	1	1	1	1	0	1	1	1	1	1	1	1	0	0	1	1	1	1	0	0	21
3	F	26	unmarried				1				0	0	0	0	0	0	1	1	1	1	1	0	1	1	1	1	0	0	0	0	0	0	0	0	0	0	0	0	9
3	F	25	unmarried				1				0	0	0	1	0	1	1	1	0	1	0	1	1	1	1	1	0	1	1	1	0	0	0	0	0	0	0	0	13
3	F	27	unmarried				1				1	1	1	1	1	1	1	1	1	1	0	0	1	1	1	1	1	0	0	1	0	0	1	1	1	1	3	1	24
3	M	30	unmarried				0				1	1	1	1	0	1	1	1	1	1	0	0	1	1	1	1	1	2	1	1	0	0	1	1	1	1	1	1	24
3	M	51	married				1				0	0	0	1	0	0	1	1	0	0	1	0	0	1	1	1	1	0	0	0	0	0	1	1	1	1	1	1	14
3	M	56	married				0				1	1	0	1	0	0	1	1	1	1	1	1	0	1	1	1	0	0	0	0	0	0	1	1	1	0	0	0	15
3	F	49	married				0				1	0	0	1	1	0	1	0	1	1	0	0	0	1	1	1	0	0	0	1	0	0	1	1	1	1	0	0	14
3	F	52	married				0				0	1	0	0	1	0	1	0	0	1	1	0	0	1	1	1	1	0	0	1	0	0	1	1	1	0	0	0	13
3	F	23	married				0				1	1	0	1	0	0	1	1	1	1	0	0	0	1	1	1	1	0	0	0	0	0	1	1	0	0	0	1	14
3	M	40	married				0				0	1	1	1	0	1	1	1	0	1	0	0	1	1	1	1	1	0	0	0	0	0	1	0	0	0	0	1	14
3	M	40	unmarried				0				0	1	0	0	0	0	1	1	1	1	0	1	1	1	1	1	0	0	0	0	0	0	0	0	0	1	0	0	11
3	F	24	unmarried				0				0	0	0	0	1	0	1	0	1	1	1	0	1	1	1	1	0	0	0	0	0	0	0	0	0	1	0	0	10
3	F	73	married				1				0	0	0	1	1	0	0	1	0	1	0	0	1	1	1	0	0	0	0	1	0	0	0	0	0	0	0	0	8
3	M	75	married				2				0	1	0	1	1	0	1	0	0	0	0	0	1	1	1	1	0	0	0	0	0	0	0	0	0	1	0	0	9
3	F	70	married				1				0	0	0	1	1	0	0	0	1	0	0	0	0	1		1	1	0	0	1	0	0	1	1	0	1	1	1	12
3	M	67	married				1				0	0	1	1	1	0	1	0	0	1	0	0	0	1	1	1	1	0	0	1	0	0	0	0	0	0	0	0	10
3	M	37	married				0				1	1	1	1	1	1	1	1	1	1	1	1	1	1	1	1	1	0	3	1	1	1	1	1	1	1	3	1	31
3	F	49	unmarried				0				1	1	1	1	1	1	1	1	1	1	0	0	1	1	1	1	1	2	2	1	1	1	1	1	1	1	3	1	30
3	F	52	unmarried				1				0	0	0	0	0	0	0	0	0	0	0	0	0	0	1	1	0	0	0	0	0	0	0	0	0	0	0	0	2
3	F	25	married				0				0	0	1	0	0	0	1	1	1	1	0	0	1	1	1	1	0	0	0	0	0	0	0	0	0	0	0	1	10
3	M	60	unmarried				0				0	0	0	1	1	0	1	1	0	0	0	1	1	1	1	1	0	0	0	1	0	0	1	0	0	1	2	1	15
3	F	90	unmarried				1				0	0	1	0	1	0	1	0	0	1	0	0	1	0	1	1	0	0	0	1	0	0	1	1	1	1	1	0	13
3	F	29	married				1				1	1	1	1	1	0	1	1	1	1	0	1	1	1	1	1	0	2	2	1	0	0	1	1	0	1	0	1	23
3	M	47	unmarried				1				0	0	0	0	0	0	1	1	0	0	0	0	1	1	1	1	0	0	0	1	0	0	1	0	0	0	0	0	8
3	F	82	married				1				0	0	1	1	1	0	1	1	0	0	0	0	1	1	1	1	0	0	0	0	0	0	1	0	0	1	1	0	12
3	F	83	unmarried				0				0	0	0	1	0	0	1	1	0	0	0	1	0	1	1	1	0	0	0	1	0	0	0	1	0	1	1	0	11
3	F	74	unmarried				0				1	0	1	1	0	0	1	0	1	1	0	0	1	1	1	1	0	0	0	1	0	0	1	0	0	1	1	0	14
3	M	83	married				0				0	0	1	1	1	0	1	1	0	1	0	0	1	1	1	1	0	0	1	0	0	0	1	0	0	1	1	0	14
3	M	55	married				0				0	0	1	0	0	0	1	1	0	1	0	1	1	1	1	1	1	0	0	1	0	0	0	0	0	0	0	0	11
3	M	53	married				0				0	0	0	0	0	0	0	0	0	0	0	0	1	1	1	1	0	0	1	1	0	0	0	0	0	0	0	0	6
3	F	49	unmarried				0				0	0	0	0	0	0	1	1	0	1	0	1	0	1	1	1	0	0	0	1	0	0	0	0	0	0	0	0	8
3	M	52	unmarried				0				0	0	0	0	0	0	0	0	0	0	0	0	0	0	1	1	0	0	0	0	0	0	1	0	0	0	0	0	3
1	F	26	unmarried								1	1	1	1	0	0	1	1	1	1	1	1	1	1	1	1	1	2	1	1	0	1	1	1	1	1	3	1	28
1	M	24	unmarried								0	0	1	1	1	1	1	1	1	1	1	1	1	1	1	1	1	3	3	1	1	1	1	1	1	1	3	1	32
1	M	50	married								1	1	1	1	0	1	1	1	0	1	999	1	0	1	1	1	1	999	999	1	1	1	1	1	0	1	3	1	3020
1	F	49	married								1	1	1	1	1	0	1	1	0	1	1	1	1	1	1	1	1	2	3	1	1	1	1	1	0	1	3	1	30
1	F	29	unmarried								1	1	1	1	1	1	1	1	1	1	1	1	1	1	1	1	1	3	2	1	1	1	1	1	1	1	3	1	33
1	M	44	married								1	1	0	1	1	1	1	1	0	1	1	1	1	1	1	1	1	2	3	1	1	1	1	1	0	1	3	1	30
1	F	55	unmarried								1	1	1	1	1	0	1	1	0	1	1	1	1	1	1	1	1	3	3	1	1	1	1	1	1	1	3	1	32
1	F	41	married								1	1	0	1	1	1	1	1	0	1	1	1	1	1	1	1	1	2	3	1	1	1	1	1	1	1	3	1	31
1	M	31	unmarried								1	1	1	1	1	1	1	1	1	1	0	1	1	1	1	1	1	3	2	1	1	1	1	1	1	1	3	1	32
1	F	35	married								1	1	1	1	1	2	1	1	1	1	1	1	1	1	1	1	1	2	2	1	1	1	1	1	0	1	3	1	32
1	F	28	unmarried								1	1	1	1	1	1	1	1	1	1	0	1	1	0	1	1	1	3	1	1	0	1	1	1	1	1	999	1	1025
1	F	38	married								999	999	999	999	999	999	999	999	999	999	999	999	999	999	999	999	999	999	999	999	999	999	999	999	999	999	999	999	27972
1	F	23	unmarried								1	0	0	1	0	1	1	1	0	1	0	0	0	1	1	1	1	3	2	1	0	1	1	1	1	1	3	1	25
1	M	30	unmarried								1	1	1	1	1	2	1	1	1	1	1	1	1	0	1	1	1	2	3	1	1	1	1	1	1	1	3	1	33
1	F	29	unmarried								1	1	1	1	0	1	1	1	1	1	1	1	1	0	1	1	1	2	3	1	1	1	1	1	1	1	3	1	31
1	F	44	married								1	1	1	1	1	1	1	1	1	1	1	1	1	1	1	1	1	3	2	1	1	1	1	1	1	1	999	1	1029
1	F	46	married								1	1	1	1	1	1	1	1	1	1	1	1	1	1	1	1	1	3	2	1	1	1	1	1	1	1	999	1	1029
1	F	37	married								1	1	1	1	1	1	1	1	1	1	1	1	1	1	1	1	1	3	2	1	1	1	1	1	1	1	999	1	1029
1	M	31	unmarried								1	1	1	1	0	1	1	1	1	1	1	1	1	1	1	1	1	2	1	1	1	1	1	1	0	1	1	1	27
1	F	49	married								1	1	1	1	1	1	1	1	1	1	1	0	1	1	1	1	1	3	2	1	1	1	0	1	0	1	1	1	28
1	F	34	unmarried								1	1	0	1	1	1	1	1	1	1	1	1	1	1	1	1	1	3	3	1	1	1	1	1	0	1	1	1	30
1	F	34	married								1	1	1	1	1	1	1	1	1	1	0	1	1	1	1	1	1	3	3	1	1	1	1	1	0	1	1	1	30
1	F	56	married								999	999	999	999	999	999	1	1	0	1	1	0	1	1	1	1	1	999	999	999	999	999	1	1	0	0	999	9999	21998
1	M	34	unmarried								1	1	1	1	1	1	1	1	1	1	0	1	1	1	1	1	1	3	3	1	1	1	1	1	1	0	999	1	1028
1	M	30	unmarried								1	1	1	1	1	1	0	1	0	999	1	1	1	1	1	1	1	3	2	1	1	1	1	0	1	1	3	1	1028
1	M	84	married								1	1	0	1	1	1	1	1	0	1	1	0	1	1	1	1	1	0	0	1	0	1	1	0	0	1	0	0	18
1	F	49	married								0	1	0	1	0	0	1	1	1	1	0	1	1	1	1	1	1	2	1	1	1	1	0	1	1	1	999	1	1021
1	M	36	unmarried								1	1	1	1	1	0	1	1	0	1	0	1	1	1	1	1	1	3	999	1	0	1	1	1	1	1	1	0	1023
1	M	36	unmarried								1	1	1	1	1	0	1	1	0	1	0	1	1	1	1	1	1	3	999	1	0	1	1	1	1	1	1	999	2022
1	F	49	married								1	1	1	1	1	2	1	1	0	1	1	1	1	1	1	1	1	3	2	1	1	1	1	1	1	1	3	1	33
1	F	44	married								0	1	0	1	0	0	1	1	0	1	0	1	1	1	1	1	1	3	0	1	0	0	0	0	1	1	999	1	1017
1	M	50	unmarried								1	1	1	1	1	1	1	1	1	1	1	1	1	1	1	1	1	1	3	1	1	1	1	0	1	1	3	1	31
1	M	25	unmarried								1	1	1	1	1	1	1	1	1	1	1	1	1	1	1	1	1	2	2	1	1	1	1	0	1	1	3	1	31
1	F	23	unmarried								1	1	1	1	1	0	1	1	1	1	0	1	0	1	1	1	1	3	3	1	1	1	1	1	1	1	3	1	31
1	M	31	unmarried								1	1	1	1	1	1	1	1	1	1	1	1	1	1	1	1	1	2	3	1	1	1	1	1	1	1	3	1	33
1	F	23	unmarried								1	1	1	1	1	1	1	1	1	1	1	1	1	1	1	1	1	2	3	1	1	1	1	1	1	1	3	1	33
1	M	48	married								1	1	1	1	1	1	1	0	0	1	1	1	1	1	1	1	1	3	3	1	1	1	1	1	1	1	3	1	32
1	F	48	married								1	1	1	1	1	1	1	1	1	1	0	1	1	1	1	1	1	3	3	1	1	1	1	1	1	1	999	1	1029
1	M	26	unmarried								1	1	1	1	1	1	1	1	1	1	1	0	1	1	1	1	1	3	3	1	1	1	1	1	1	1	3	1	33
1	M	28	unmarried								1	1	1	1	1	2	1	1	1	1	1	1	1	1	1	1	1	1	2	1	1	1	1	0	1	1	3	1	31
1	F	32	married								0	0	1	1	1	0	1	1	1	1	1	0	1	0	1	1	1	0	0	1	0	1	0	0	1	1	3	1	20
1	F	35	unmarried								1	1	1	1	1	1	1	1	1	1	1	1	1	1	1	1	1	3	3	1	1	1	1	0	1	1	3	1	33
1	F	53	unmarried								1	1	1	1	1	1	1	1	1	1	1	1	1	0	1	1	1	3	3	1	1	1	1	1	1	1	3	1	33
1	F	31	unmarried								1	1	1	1	1	0	1	1	1	1	1	1	1	1	1	1	1	3	2	1	1	1	1	1	1	1	3	1	32
1	F	41	unmarried								1	1	0	1	1	1	1	1	1	1	0	1	1	1	1	1	1	3	2	1	1	1	1	1	1	1	3	1	31
1	F	33	married								1	1	1	1	1	1	1	1	1	1	1	1	1	1	1	1	1	3	2	1	1	1	1	1	0	1	3	1	32
1	F	35	married								0	1	1	1	1	0	1	1	1	1	0	1	1	1	1	1	1	3	3	1	0	1	0	1	1	1	2	1	28
1	F	51	married								1	1	1	1	1	0	1	1	1	1	1	1	1	1	1	1	1	2	3	1	1	1	1	1	0	1	3	1	31
1	F	38	married								999	999	999	1	999	999	999	999	999	999	999	999	999	999	999	999	999	999	999	999	999	999	999	999	999	999	999	999	26974
1	F	26	unmarried								1	1	1	1	1	2	1	1	1	0	1	1	1	1	1	1	1	2	1	1	1	1	1	1	1	1	2	1	30
1	F	38	unmarried								1	1	1	1	1	2	1	1	0	1	1	1	1	1	1	1	1	3	3	1	1	1	1	1	1	1	3	1	34
1	F	40	married								0	0	0	0	0	0	0	0	0	0	0	0	0	0	1	1	0	0	0	1	1	1	1	0	0	0	999	1	1006
1	M	65	unmarried								1	1	1	1	1	0	1	1	1	1	1	1	1	1	1	1	1	2	3	1	1	1	1	0	1	1	3	1	31
1	F	35	married								1	1	1	1	1	1	1	1	1	1	1	1	1	1	1	1	1	3	3	1	1	1	1	1	0	1	3	1	33
1	F	50	married								1	1	1	1	1	0	1	1	1	1	1	1	1	0	1	1	1	2	1	1	1	1	1	1	1	1	3	1	29
1	F	51	married								1	1	0	1	1	1	1	1	0	1	1	1	1	1	1	1	1	3	2	1	1	999	1	1	1	1	3	1	1029
1	F	60	married								1	1	1	1	1	1	1	1	1	1	1	1	1	1	1	1	1	0	1	1	0	1	1	1	1	1	3	1	28
1	F	55	unmarried								1	1	1	1	1	1	1	1	0	1	1	1	1	1	1	1	1	2	2	1	1	1	1	1	0	1	3	1	30
1	F	50	unmarried								1	1	1	1	1	0	1	1	1	1	1	1	1	1	1	1	1	3	2	1	1	1	1	1	0	1	3	1	31
1	F	43	married								1	1	1	1	1	1	1	1	1	1	0	1	1	1	1	1	1	3	999	1	1	1	1	1	0	1	999	999	3022
1	M	36	unmarried								1	1	1	1	1	1	1	1	0	1	1	1	1	1	1	1	1	2	1	1	1	1	1	1	1	1	1	1	28
1	M	25	unmarried								1	0	1	1	999	0	1	1	0	1	999	0	1	1	1	1	1	999	999	1	1	1	1	1	1	0	999	999	6011
1	F	38	unmarried								1	1	1	1	1	1	0	1	1	1	1	1	1	0	1	1	1	3	3	1	1	1	1	1	1	1	3	1	32
1	F	43	married								1	1	1	1	1	2	1	1	1	1	1	0	1	1	1	1	1	3	3	1	1	1	1	1	1	1	3	1	34
1	F	23	unmarried								1	1	1	1	1	0	1	1	0	1	1	1	1	0	1	1	1	3	3	1	0	1	1	1	0	1	999	1	1025
1	F	50	unmarried								1	1	1	1	1	1	1	1	1	1	1	1	1	1	1	1	1	3	1	1	1	1	1	1	1	1	3	1	32
1	F	28	unmarried								1	1	1	1	1	1	1	1	1	1	999	1	1	1	1	1	1	3	3	1	1	1	1	1	1	1	3	1	1032
1	F	38	married								0	0	0	1	0	1	1	1	1	1	1	1	1	1	1	1	1	3	3	1	1	1	1	1	0	1	3	1	29
1	F	23	unmarried								1	1	1	1	1	1	1	1	1	1	1	1	1	1	1	1	1	3	3	1	1	1	1	1	1	1	2	1	33
1	F	43	married								1	1	1	1	1	0	1	1	1	1	1	1	1	1	1	1	1	2	2	1	1	1	1	1	1	1	3	1	31
1	F	24	unmarried								1	1	1	1	1	0	1	1	1	1	0	1	1	1	1	1	1	3	3	1	1	1	1	1	0	1	3	1	31
1	F	48	unmarried								1	1	1	1	0	0	1	1	1	1	1	1	1	1	1	1	1	2	3	1	1	1	1	1	0	1	3	1	30
1	F	35	unmarried								1	1	1	1	1	0	1	1	1	1	1	1	1	1	1	1	1	2	3	1	1	1	1	1	1	1	3	1	32
1	F	28	unmarried								1	1	1	1	1	1	1	1	1	1	1	1	1	1	1	1	1	3	3	1	0	1	1	1	1	1	3	1	33
1	M	59	married								0	0	0	0	0	0	1	1	0	1	0	1	1	1	1	1	1	999	0	1	0	1	1	0	0	1	2	0	1014
1	M	23	unmarried								1	1	1	1	1	0	1	1	0	1	1	1	1	1	1	1	1	0	0	0	1	1	1	1	0	1	3	1	24
1	M	36	married								1	1	1	1	1	0	1	1	1	1	1	1	1	1	1	1	1	3	3	1	1	1	1	1	0	1	3	1	32
1	M	31	unmarried								1	1	1	1	1	1	0	1	0	1	0	0	1	0	1	0	1	2	3	1	0	1	0	0	0	1	999	0	1018
1	M	35	married								1	1	1	1	1	0	1	1	1	1	1	1	1	1	1	1	1	2	3	1	1	1	1	1	1	1	3	0	31
1	F	29	married								1	1	1	1	1	1	1	1	0	1	1	1	1	1	1	1	1	1	3	1	0	1	1	1	0	1	3	1	29
1	M	39	married								1	1	1	1	0	0	1	1	1	1	0	1	1	0	1	1	1	1	2	1	1	1	1	1	1	1	3	1	27
1	M	53	married								1	1	1	1	1	0	1	1	1	1	0	1	1	1	1	1	1	2	3	1	1	1	1	1	1	1	999	1	1027
1	F	29	unmarried								1	1	1	1	1	0	1	1	1	1	0	1	1	1	1	1	1	2	2	1	1	1	1	1	1	1	3	1	30
1	F	41	married								1	1	1	1	1	1	1	1	1	1	0	1	1	1	1	1	1	3	3	1	1	1	1	1	1	1	999	1	1029
1	M	32	married								1	1	1	1	1	0	1	1	1	1	0	1	1	1	1	1	1	3	2	1	1	1	1	1	1	1	999	1	1027
1	F	29	married								1	1	1	1	1	1	1	1	1	1	0	1	1	1	1	1	1	3	1	1	1	1	1	1	1	1	3	1	31
1	M	27	unmarried								1	1	1	1	0	0	1	1	1	1	0	1	1	0	1	1	1	3	2	1	1	1	1	1	1	1	3	1	29
1	F	32	unmarried								1	1	1	1	0	0	1	1	1	1	0	1	1	1	1	1	1	2	3	1	1	1	1	1	1	1	3	1	30
1	F	34	married								0	1	1	1	1	1	1	1	0	1	0	0	1	1	1	1	1	3	3	1	1	1	0	1	1	1	999	1	1025
1	M	45	married								1	1	1	1	1	2	1	1	1	1	0	1	1	1	1	1	1	3	2	1	1	1	1	1	1	1	3	1	33
1	F	48	married								1	1	1	1	0	1	1	1	1	1	0	1	1	1	1	1	1	3	3	1	1	1	1	1	1	1	3	1	32
1	F	43	married								1	1	1	1	0	1	1	1	1	1	0	1	1	1	1	1	1	3	3	1	1	1	1	1	1	1	3	1	32
1	F	25	unmarried								1	1	1	1	1	2	1	1	1	1	1	1	1	1	1	1	1	3	3	1	1	1	1	0	1	1	3	1	34
1	F	38	married								1	1	1	1	1	2	1	1	1	1	1	1	1	1	1	1	1	1	2	1	1	1	1	1	0	1	1	1	29
1	F	43	married								1	1	1	1	1	1	1	1	0	1	1	1	1	0	1	1	1	2	2	999	1	1	1	1	1	1	3	1	1028
1	F	37	unmarried								1	1	1	1	1	2	1	1	0	1	0	1	1	1	1	1	1	3	2	1	0	1	1	1	1	1	3	1	31
1	F	37	married								999	999	999	999	999	999	1	1	1	1	1	0	0	1	1	1	999	999	999	999	999	999	999	999	999	1	999	1	15994
1	F	30	married								1	1	1	1	1	1	1	1	0	1	1	1	1	1	1	1	1	1	2	1	0	1	1	1	0	1	3	1	28
1	F	40	married								1	1	1	1	1	0	1	1	1	1	1	0	1	1	1	1	1	3	2	1	999	1	0	1	1	1	999	1	2024
1	M	36	unmarried								1	1	1	1	1	2	1	1	1	1	0	0	1	1	1	1	1	3	3	1	1	1	1	1	0	1	3	1	32
1	F	42	unmarried								1	1	1	1	0	0	1	1	1	1	0	1	1	1	1	1	1	1	0	1	1	1	1	1	0	1	3	1	25
1	F	44	married								1	1	1	1	1	0	1	1	0	1	1	1	1	1	1	1	1	0	0	1	1	1	1	0	0	1	3	1	24
1	M	33	unmarried								1	1	1	1	1	2	1	1	0	1	1	1	1	1	1	1	1	3	1	1	0	1	1	1	1	1	3	1	31
1	F	35	married								1	1	1	1	1	0	1	1	1	1	0	1	1	999	1	1	1	2	3	1	1	1	1	1	1	1	3	1	1029
1	F	31	unmarried								0	1	1	1	1	0	1	1	0	1	1	1	1	1	1	1	1	2	3	1	1	1	1	0	0	0	3	1	27
1	F	34	married								1	1	1	1	1	1	1	1	1	1	0	1	1	1	1	1	1	3	3	1	1	1	1	1	1	1	3	1	33
1	F	50	married								0	0	0	0	0	1	1	1	0	1	1	0	1	1	1	1	1	2	3	1	0	1	1	1	1	0	3	0	23
1	F	25	unmarried								1	1	1	1	1	2	1	1	1	1	1	1	1	1	1	1	1	3	2	1	1	1	1	1	1	1	3	1	34
1	F	24	unmarried								1	1	1	1	1	0	1	1	0	1	0	0	0	0	1	1	1	3	0	1	1	1	1	0	1	1	3	1	24
1	M	24	unmarried								1	1	1	1	1	1	0	1	0	1	0	1	1	1	1	1	1	999	0	1	1	1	1	1	1	1	3	1	1024
1	F	23	unmarried								1	1	1	1	1	2	1	1	0	1	1	0	1	1	1	1	1	2	3	1	1	1	1	1	1	1	3	1	32
1	F	50	married								1	1	1	1	1	2	1	1	0	1	1	1	1	1	1	1	1	3	3	1	1	1	1	1	0	1	3	1	33
1	M	36	married								1	1	1	1	1	0	1	1	0	1	0	1	1	0	1	1	1	1	2	1	999	1	1	1	1	1	3	1	1025
1	M	42	married								1	1	1	1	1	1	1	1	0	1	0	1	1	1	1	1	1	2	3	1	1	1	1	1	0	1	3	1	30
1	F	39	unmarried								1	1	1	1	1	1	1	1	0	1	1	0	0	1	1	1	1	3	2	1	1	1	1	1	0	1	3	1	29
1	M	46	married								1	1	0	1	999	1	1	1	1	1	1	0	1	1	1	1	1	3	999	1	999	999	1	1	0	1	999	999	6015
1	F	25	married								1	1	1	1	1	1	1	1	1	1	1	1	1	1	1	1	1	3	3	1	1	1	1	1	0	1	3	1	33
1	F	31	married								1	1	1	1	1	1	1	1	1	1	1	1	1	1	1	1	1	3	0	1	1	1	1	1	0	1	3	1	30
1	F	50	married								0	1	1	1	1	1	1	1	0	1	0	1	1	1	1	1	1	999	999	1	999	999	0	1	0	1	999	1	5013
1	F	30	unmarried								1	1	1	1	1	0	1	1	1	1	1	1	1	1	1	1	1	3	3	1	1	1	1	1	1	1	3	1	33
1	F	52	unmarried								1	1	1	1	1	1	1	1	1	1	1	1	1	1	1	1	1	2	2	1	1	1	1	1	1	1	3	1	32
1	M	26	unmarried								1	1	1	0	1	1	1	1	1	1	1	1	1	1	1	1	1	3	2	1	1	1	1	1	0	1	3	1	31
1	F	42	married								1	1	1	1	1	1	1	1	1	1	1	1	1	1	1	1	1	3	3	1	1	1	1	1	1	1	3	1	34
1	M	31	married								1	1	1	1	1	2	1	1	1	1	0	1	1	1	1	1	1	3	3	1	1	1	1	1	1	1	3	1	34

## Sheet: Legend
	Group	1	Health care providers
		2	Patients
		3	General public
	Gender	M	Male
		F	Female
	Treatment Therapy	AVK	Vitamin K Antagonist
		DOAC	Direct Oral anticogualation
	Clinical Indication	VTE	Venous Thromboembolism
		IMA	Acute Myocardial Infarction
		AF	Atrial Fibrillation/Atrial Flutter
		PAF	Persistent atrial fibrillation
		MVR	Mitral Valve Replacement
		AVR	Aortic Valve Replacement
		PTA	Percutaneous Transluminal Angioplasty
	CCI	Charloson Comorbility Index
	Akt scale	Section A	item 1-20
		Section B	Item 1-7
